# Supplementary material
Source: HighWire-hosted journal article supplement (https://bmjopen.bmj.com/content/8/6/e022298)
Supplement: inline-supplementary-material-3 [file inline-supplementary-material-3.pdf]

**Supplementary File 3.** Sample image-based tweets promoting the Cochrane systematic reviews

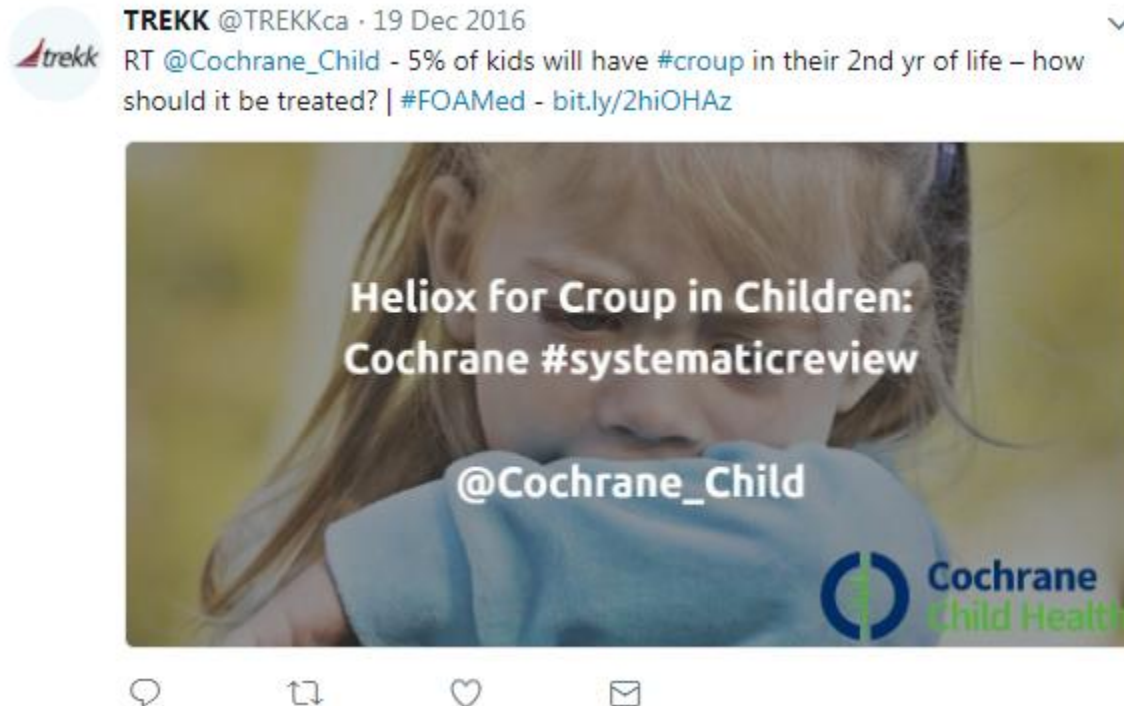

**Figure 1.** Sample image-based tweet for croup

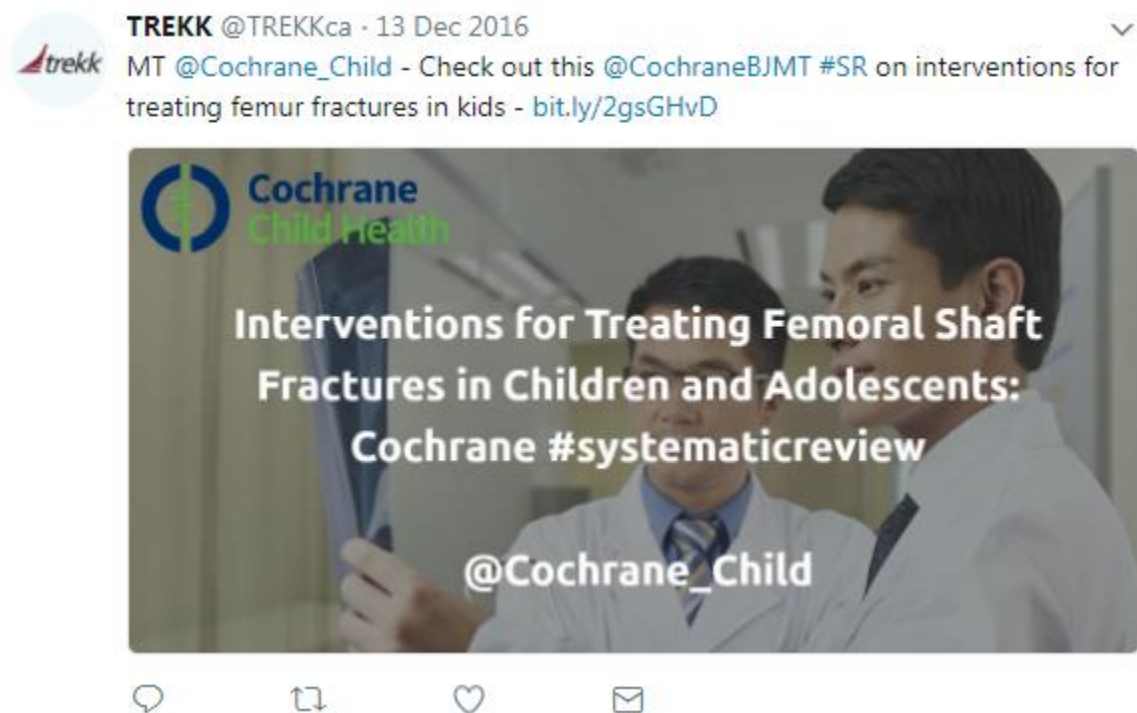

**Figure 2.** Sample image-based tweet for fractures

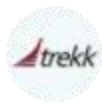

**TREKK** @TREKKca · 21 Nov 2016

RT @Cochrane\_Child - Check out @CochraneUGPD evidence on the safety & effectiveness of antiemetics for #gastro - [bit.ly/2fk4bpv](http://bit.ly/2fk4bpv)

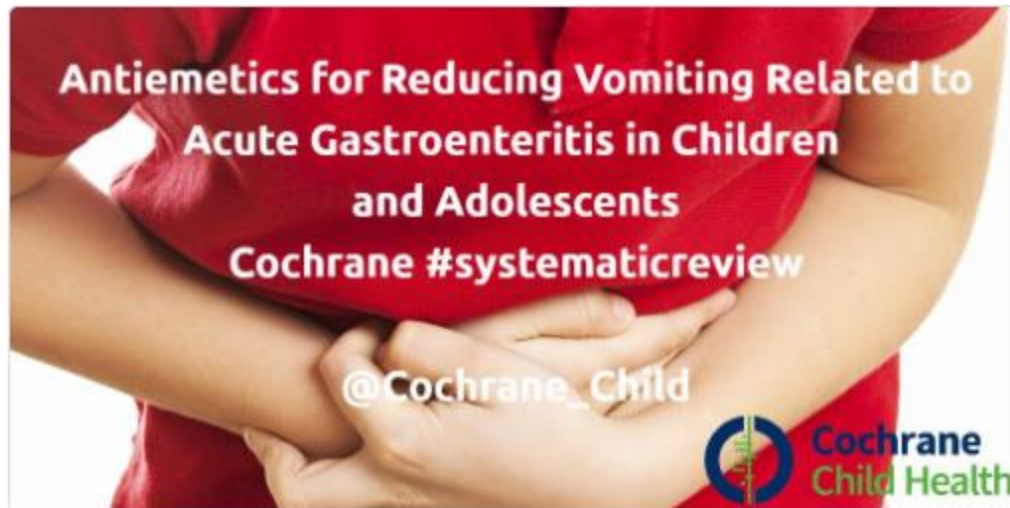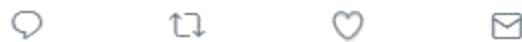

**Figure 3.** Sample image-based tweet for gastroenteritis

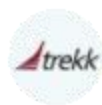

**TREKK** @TREKKca · 22 Oct 2016

MT @Cochrane\_Child - Rotavirus #diarrhea prevention | Check out @Cochrane\_IDG evidence & stay up-to-date on #EBM! - [bit.ly/2dZaMFi](http://bit.ly/2dZaMFi)

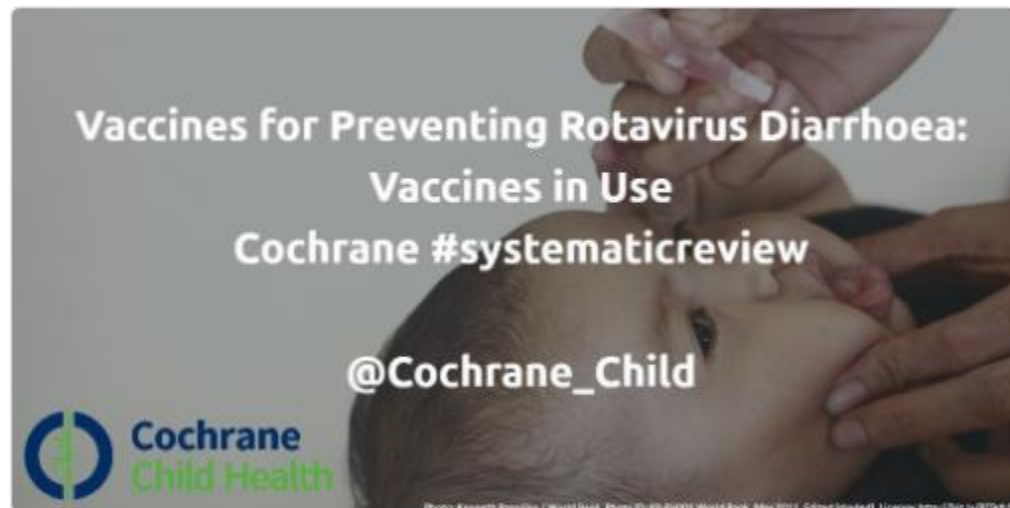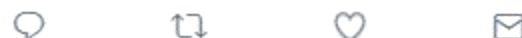

**Figure 4.** Sample image-based tweet for intussusception

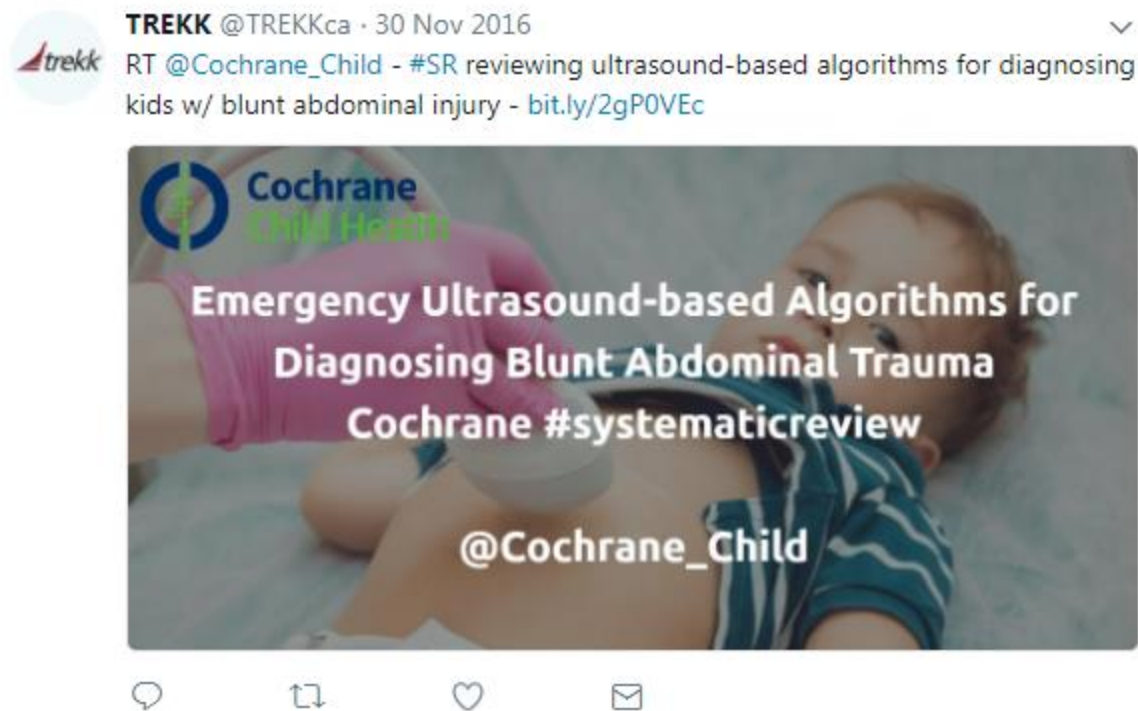

**Figure 5.** Sample image-based tweet for multisystem trauma

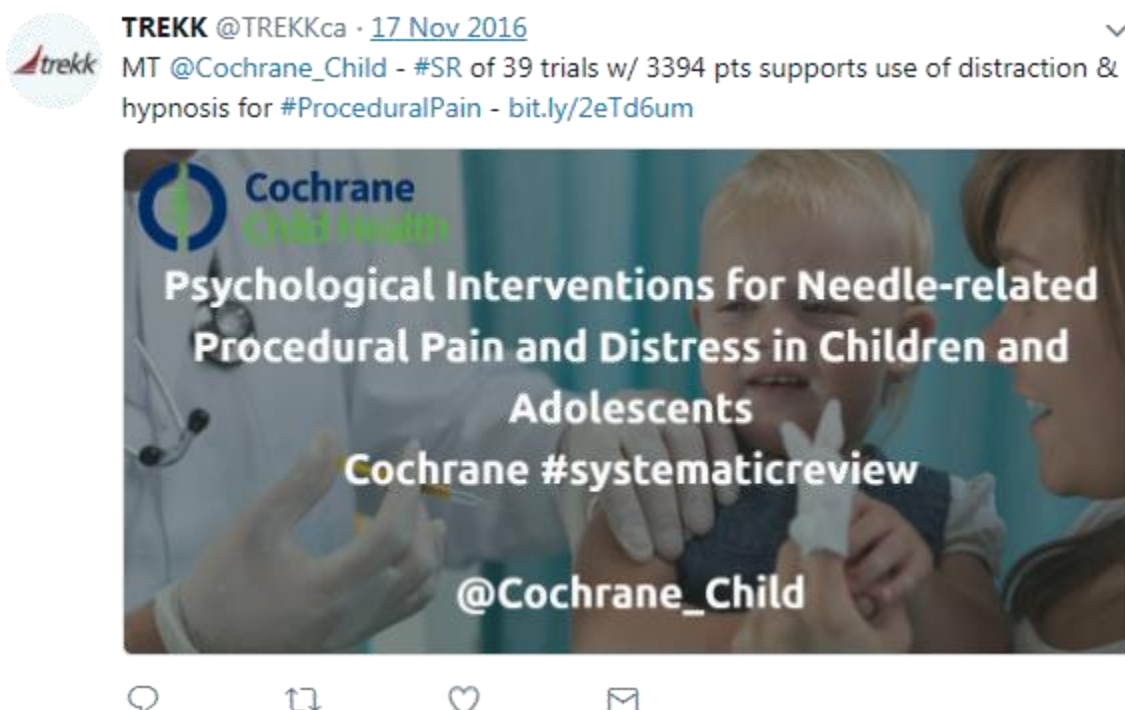

**Figure 6.** Sample image-based tweet for procedural pain
